# Supplementary material for: Defect-engineered N-doped carbon stabilizes Cu + active sites for bifunctional CO 2 electroreduction to CO and formate
Source: Royal Society of Chemistry journal article supplement (doi:10.1039/d5ra08966b), 2026-01-01
Supplement: d5ra08966b1.pdf [file d5ra08966b1.pdf]

Supplementary Information

**Defect-Engineered N-Doped Carbon Stabilizes Cu<sup>+</sup> Active  
Sites for Bifunctional CO<sub>2</sub> Electroreduction to CO and  
Formate**

Pirapath Arkasalerks<sup>a</sup>, Phongphot Sakulaue<sup>a,b</sup>, Pongkarn Chakthranont<sup>c</sup>, Kanokwan  
Kongpatpanich<sup>d</sup>, Khanin Nueangnoraj<sup>a\*</sup>

<sup>a</sup> *School of Bio-Chemical Engineering and Technology, Sirindhorn International Institute of Technology, Thammasat University, Pathum Thani, 12120, Thailand.*

<sup>b</sup> *Division of Chemical Engineering, Faculty of Engineering, Rajamangala University of Technology Krungthep, Bangkok 10120, Thailand.*

<sup>c</sup> *National Nanotechnology Center (NANOTEC), National Science and Technology Development Agency (NSTDA), Khlong Luang, Pathum Thani, 12120, Thailand*

<sup>d</sup> *Department of Materials Science and Engineering, School of Molecular Science and Engineering, Vidyasirimedhi Institute of Science and Technology, Rayong 21210, Thailand.*

\*Corresponding author: K. Nueangnoraj (khanin@siit.tu.ac.th).

**Table S1.** Specific surface area ( $S_{\text{BET}}$ ) and porous properties of the as-prepared carbons and composites.

| sample     | $S_{\text{BET}}$<br>( $\text{m}^2 \text{ g}^{-1}$ ) | $V_{\text{total}}$<br>( $\text{cm}^3 \text{ g}^{-1}$ ) | $V_{\text{micro}}$<br>( $\text{cm}^3 \text{ g}^{-1}$ ) | $V_{\text{meso}}$<br>( $\text{cm}^3 \text{ g}^{-1}$ ) |
|------------|-----------------------------------------------------|--------------------------------------------------------|--------------------------------------------------------|-------------------------------------------------------|
| YEC        | 1,840                                               | 0.90                                                   | 0.84                                                   | 0.06                                                  |
| TL9        | 1,770                                               | 0.86                                                   | 0.74                                                   | 0.12                                                  |
| YEC/Cu-40% | 855                                                 | 0.47                                                   | 0.40                                                   | 0.07                                                  |
| TL9/Cu-10% | 1,329                                               | 0.79                                                   | 0.60                                                   | 0.19                                                  |
| TL9/Cu-20% | 970                                                 | 0.57                                                   | 0.46                                                   | 0.11                                                  |
| TL9/Cu-30% | 884                                                 | 0.59                                                   | 0.38                                                   | 0.21                                                  |
| TL9/Cu-40% | 840                                                 | 0.53                                                   | 0.40                                                   | 0.13                                                  |
| TL9/Cu-50% | 535                                                 | 0.70                                                   | 0.32                                                   | 0.38                                                  |

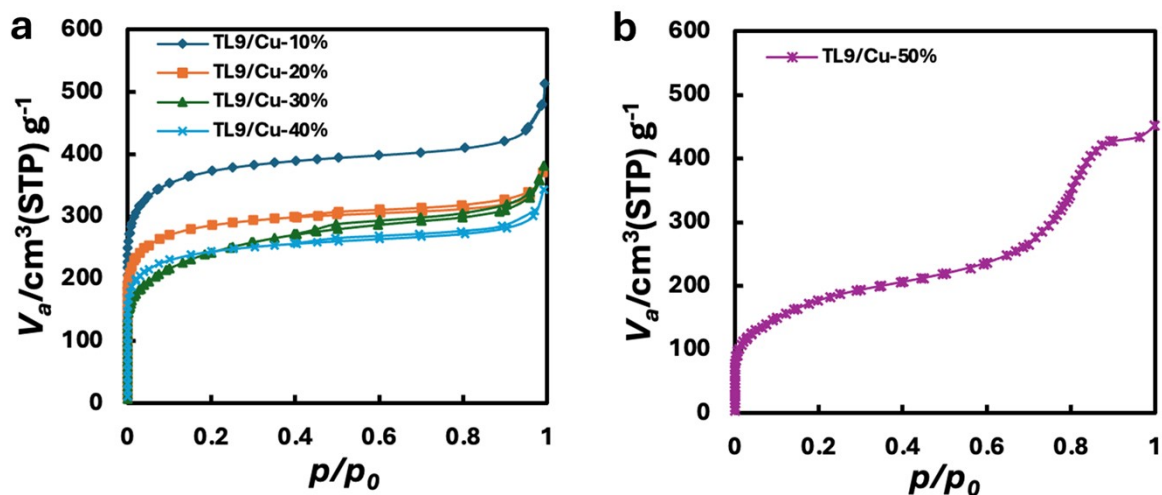

**Figure S1.** N<sub>2</sub> adsorption-desorption isotherms of (a) TL9 with Cu<sub>2</sub>O loading from 10% to 40% and (b) TL9/Cu-50%.

**Table S2.** Details for the deconvolution from Raman spectra.

| sample | peak | peak<br>position | fitted<br>area | %area | intensity | FWHM   | $I_D/I_G$ |
|--------|------|------------------|----------------|-------|-----------|--------|-----------|
| YEC    | D*   | 1,200.0          | 43,144.5       | 18.55 | 183.56    | 220.08 | 2.94      |
|        | D    | 1,344.9          | 91,663.4       | 39.40 | 513.7     | 163.95 |           |
|        | D**  | 1,525.6          | 70,150.7       | 30.15 | 377.6     | 173.17 |           |
|        | G    | 1,588.1          | 27,679.6       | 11.90 | 365       | 70.8   |           |
| TL9    | D*   | 1,200.0          | 33,678.5       | 16.47 | 134.94    | 234.45 | 3.42      |
|        | D    | 1,344.1          | 89,984.3       | 43.99 | 504.11    | 167.69 |           |

|                |     |         |          |       |        |         |      |
|----------------|-----|---------|----------|-------|--------|---------|------|
|                | D** | 1,538.7 | 60,879.3 | 29.76 | 357.49 | 160     |      |
|                | G   | 1,590.0 | 19,995.5 | 9.78  | 291.48 | 64.44   |      |
| YEC/Cu-<br>40% | D*  | 1,200.0 | 10,450.0 | 20.14 | 41.323 | 237.44  | 3.06 |
|                | D   | 1,342.2 | 19,327.0 | 37.25 | 136.46 | 137.55  |      |
|                | D** | 1,528.7 | 16,102.9 | 31.04 | 90.24  | 171.319 |      |
|                | G   | 1,591.9 | 6,004.84 | 11.57 | 87.7   | 62.42   |      |
| TL9/Cu-<br>10% | D*  | 1,200.0 | 33,678.5 | 16.47 | 134.94 | 234.45  | 3.83 |
|                | D   | 1,344.1 | 89,984.3 | 43.99 | 504.11 | 167.69  |      |
|                | D** | 1,538.7 | 60,879.3 | 29.76 | 357.49 | 160     |      |
|                | G   | 1,590.0 | 19,995.5 | 9.78  | 291.48 | 64.44   |      |

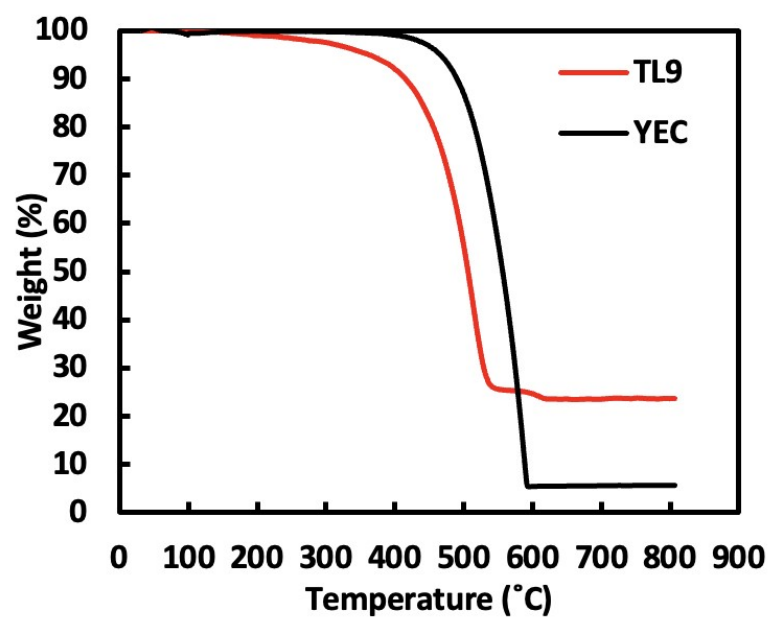

**Figure S2.** TGA plots of TL9 and YEC under air flow.

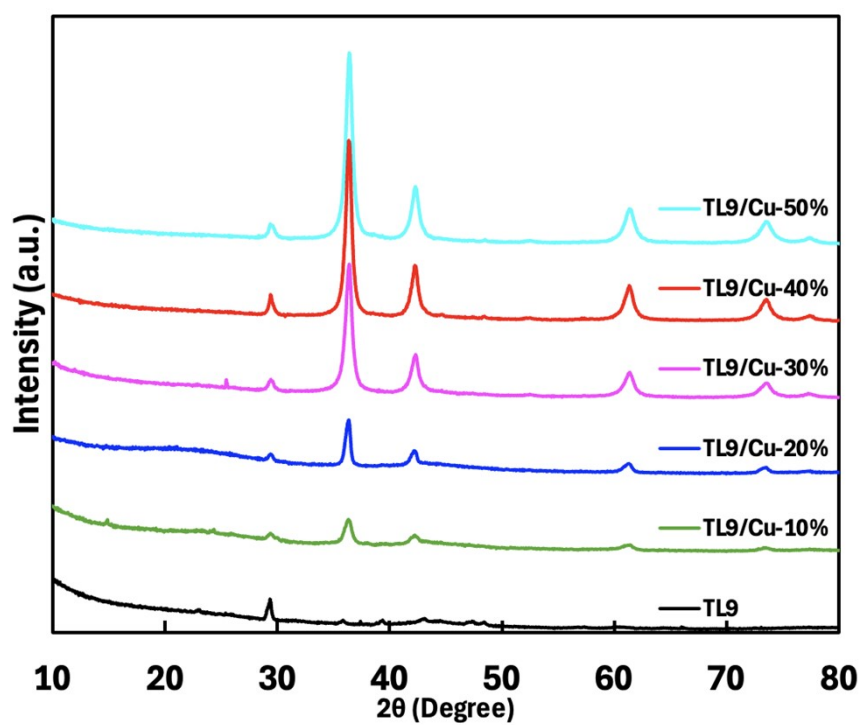

**Figure S3.** XRD patterns of the composites with various Cu<sub>2</sub>O loading on TL9.

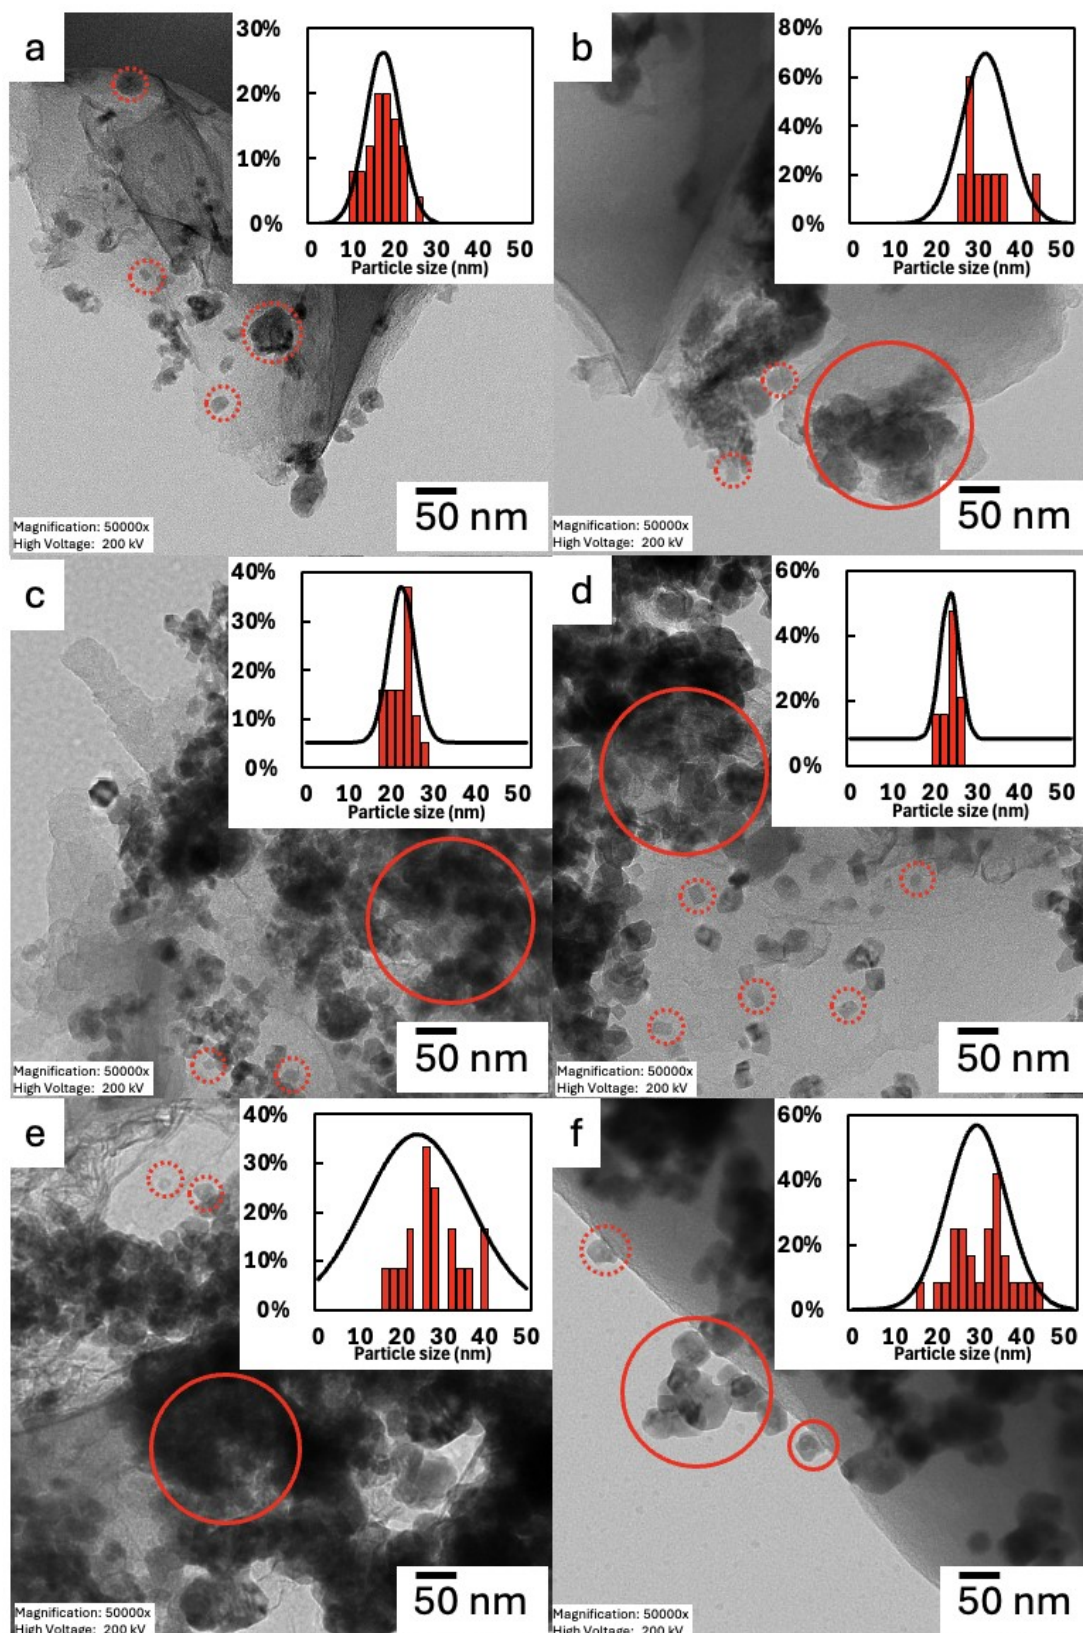

**Figure S4.** TEM images of (a) TL9/Cu-10%, (b) TL9/Cu-20%, (c) TL9/Cu-30%, (d) TL9/Cu-40%, (e) TL9/Cu-50%, and (f) YEC/Cu-40% with (inset) their particle size distributions.



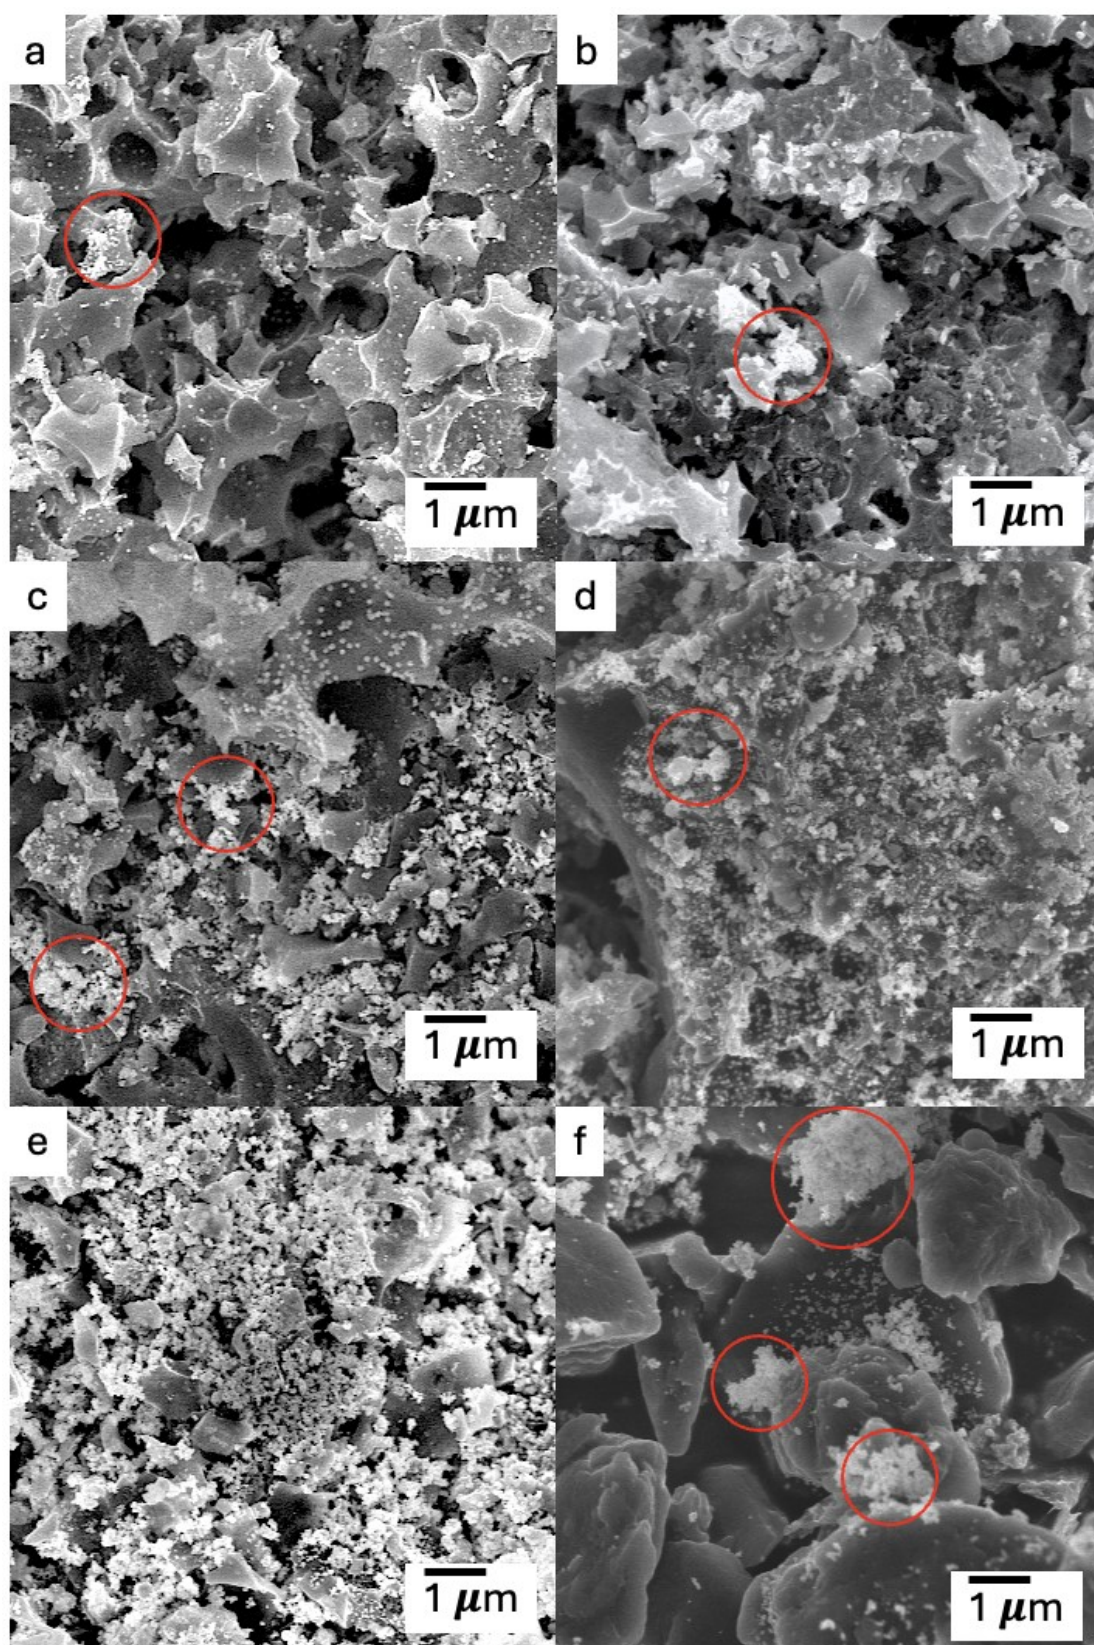

**Figure S5.** SEM images of (a) TL9/Cu-10%, (b) TL9/Cu-20%, (c) TL9/Cu-30%, (d) TL9/Cu-40%, (e) TL9/Cu-50%, and (f) YEC/Cu-40%.



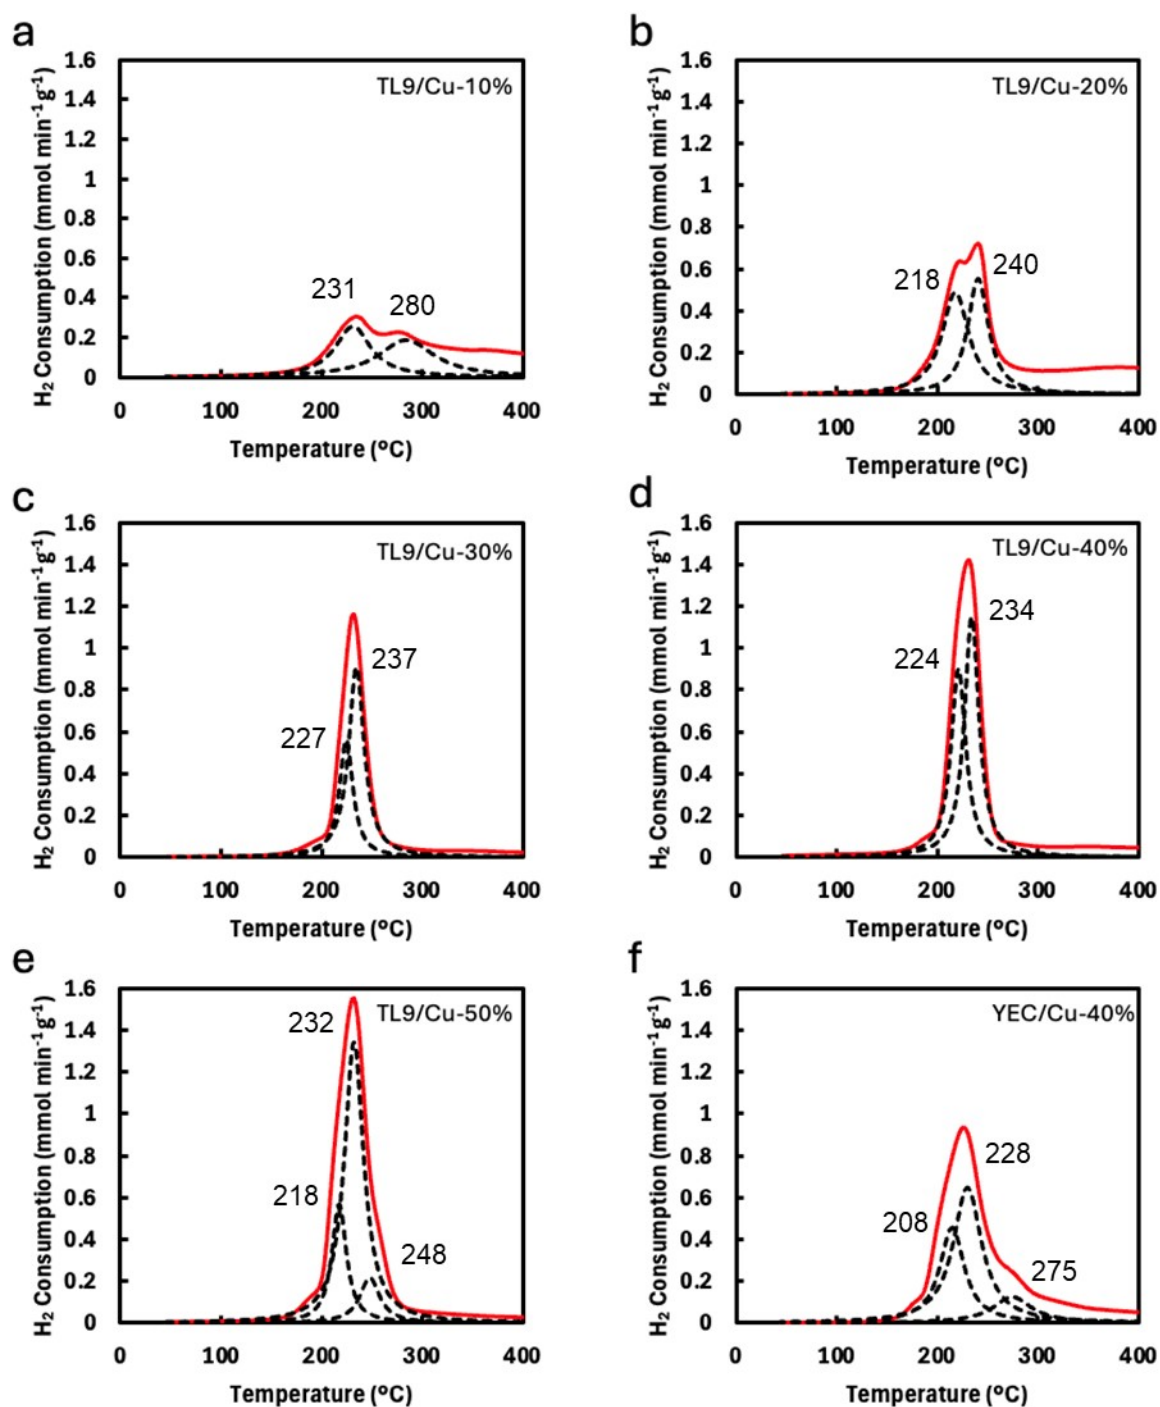

**Figure S6.** H<sub>2</sub>-TPR profiles corresponded to (a) TL9/Cu-10%, (b) TL9/Cu-20%, (c) TL9/Cu-30%, (d) TL9/Cu-40%, (e) TL9/Cu-50%, and (f) YEC/Cu-40%.

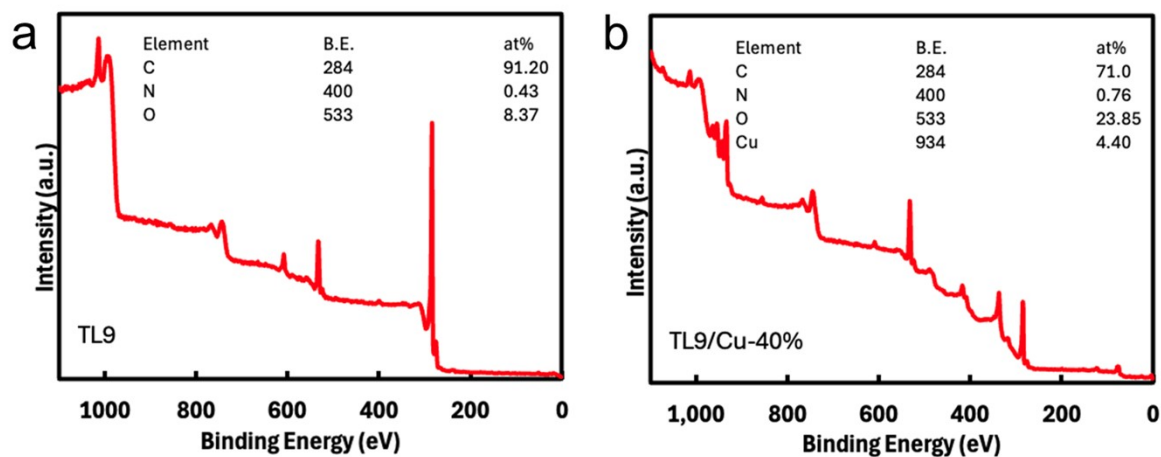

**Figure S7.** XPS survey spectrum of (a) TL9 and (b) TL9/Cu-40%.

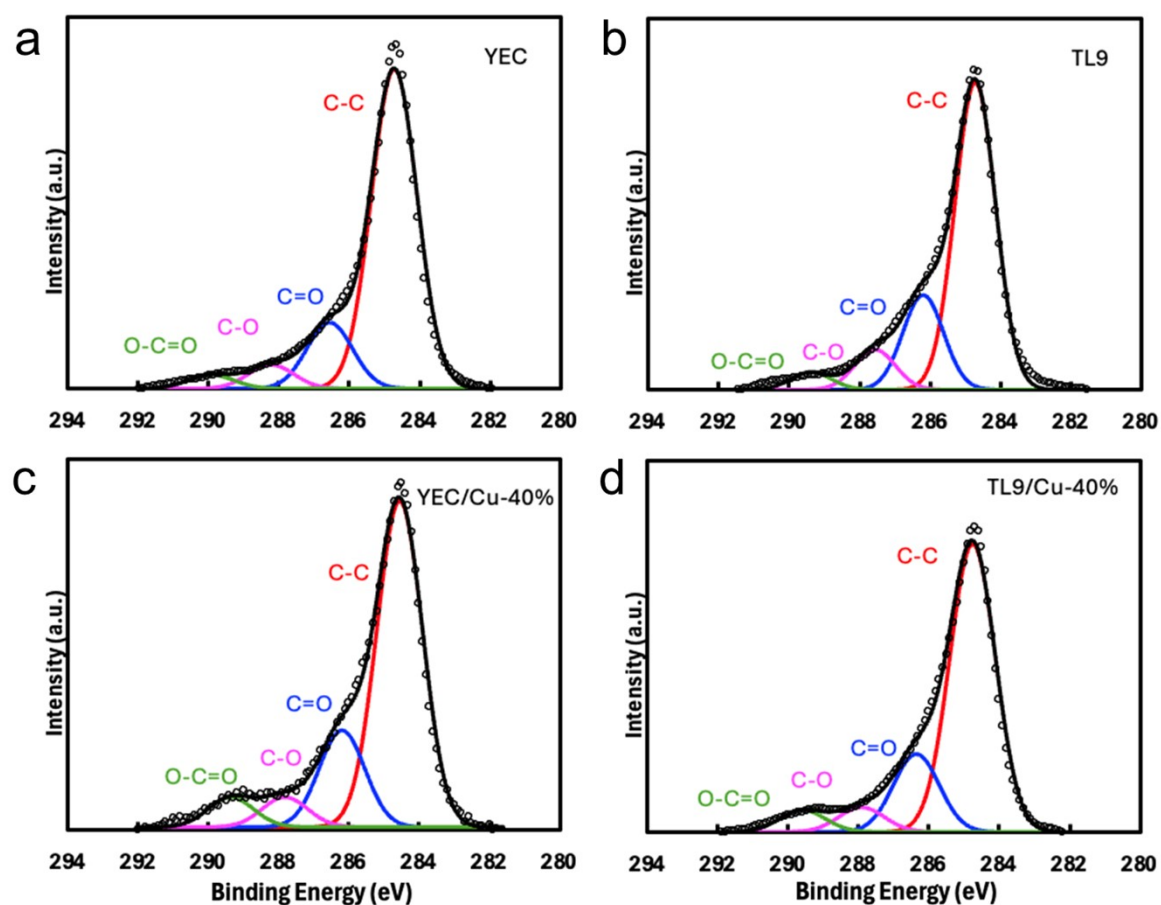

**Figure S8.** C 1s spectra corresponded to (a) YEC, (b) TL9, (c) YEC/Cu-40%, and (d) TL9/Cu-40%.

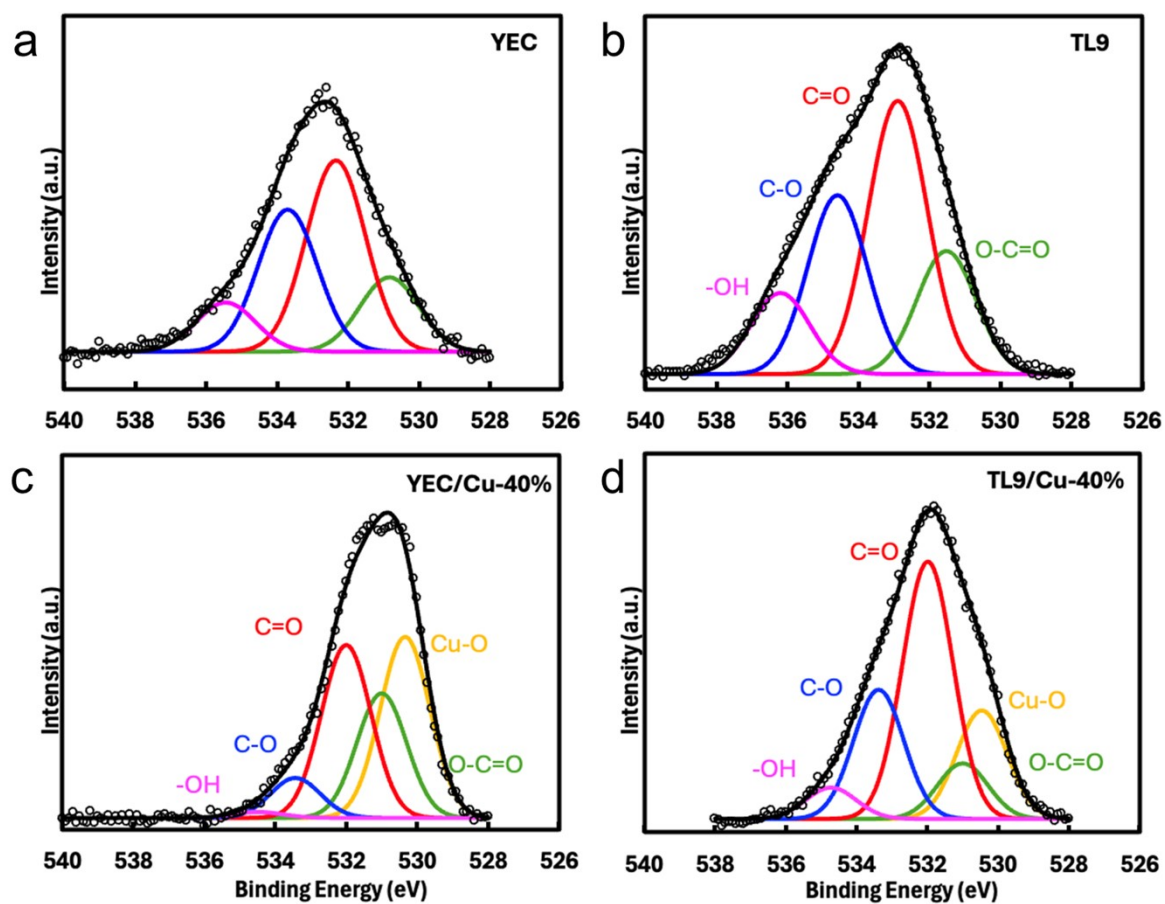

**Figure S9.** O 1s spectra corresponded to (a) YEC, (b) TL9, (c) YEC/Cu-40%, and (d) TL9/Cu-40%.

**Table S3.** Relative composition of each Cu oxidation state determined from Cu LMM region of TL9 under various Cu<sub>2</sub>O loadings.

| sample     | oxidation state |     |                 |     |                  |     |
|------------|-----------------|-----|-----------------|-----|------------------|-----|
|            | Cu <sup>0</sup> |     | Cu <sup>+</sup> |     | Cu <sup>2+</sup> |     |
|            | K.E.            | at% | K.E.            | at% | K.E.             | at% |
|            | (eV)            |     | (eV)            |     | (eV)             |     |
| TL9/Cu-10% | -               | -   | 916.7           | 88  | 913.1            | 12  |
| TL9/Cu-20% | 920.6           | 3   | 916.8           | 72  | 913.3            | 25  |
| TL9/Cu-30% | 919.3           | 14  | 916.7           | 70  | 913.3            | 16  |
| TL9/Cu-40% | 920.1           | 14  | 916.8           | 70  | 913.2            | 16  |
| TL9/Cu-50% | 919.1           | 15  | 916.8           | 72  | 913.2            | 13  |
| YEC/Cu-40% | 919.2           | 34  | 916.8           | 52  | 912.6            | 14  |

**Table S4.** XPS-derived atomic percentages of Cu, Cu–N<sub>x</sub>, and nitrogen species (pyridinic-N, pyrrolic-N, and graphitic-N) for TL9 and TL9/Cu-x% catalysts.

| <b>Sample</b>          | <b>Cu<br/>(at%)</b> | <b>Cu-N<sub>x</sub><br/>(at%)</b> | <b>Pyridinic-N<br/>(at%)</b> | <b>Pyrrolic-N<br/>(at%)</b> | <b>Graphitic-N<br/>(at%)</b> |
|------------------------|---------------------|-----------------------------------|------------------------------|-----------------------------|------------------------------|
| <b>TL9</b>             |                     |                                   | 0.098                        | 0.169                       | 0.164                        |
| <b>TL9/Cu-<br/>10%</b> | 1.520               | 0.122                             | 0.132                        | 0.134                       | 0.041                        |
| <b>TL9/Cu-<br/>20%</b> | 2.520               | 0.147                             | 0.121                        | 0.124                       | 0.038                        |
| <b>TL9/Cu-<br/>30%</b> | 3.930               | 0.205                             | 0.144                        | 0.065                       | 0.016                        |
| <b>TL9/Cu-<br/>40%</b> | 4.400               | 0.212                             | 0.145                        | 0.036                       | 0.036                        |
| <b>TL9/Cu-<br/>50%</b> | 9.330               | 0.214                             | 0.131                        | 0.057                       | 0.028                        |

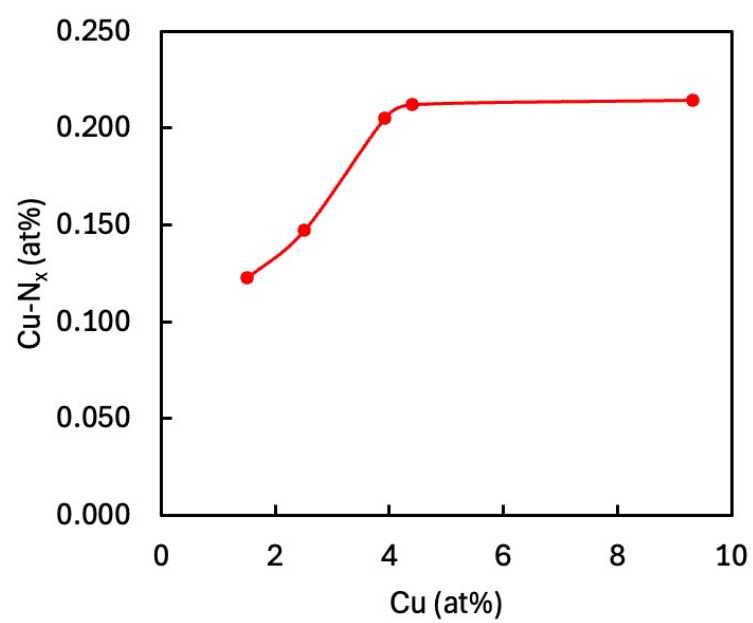

**Figure S10.** Correlation between Cu atomic percentage (Cu at%) and Cu-N<sub>x</sub> derived from N 1s deconvolution.



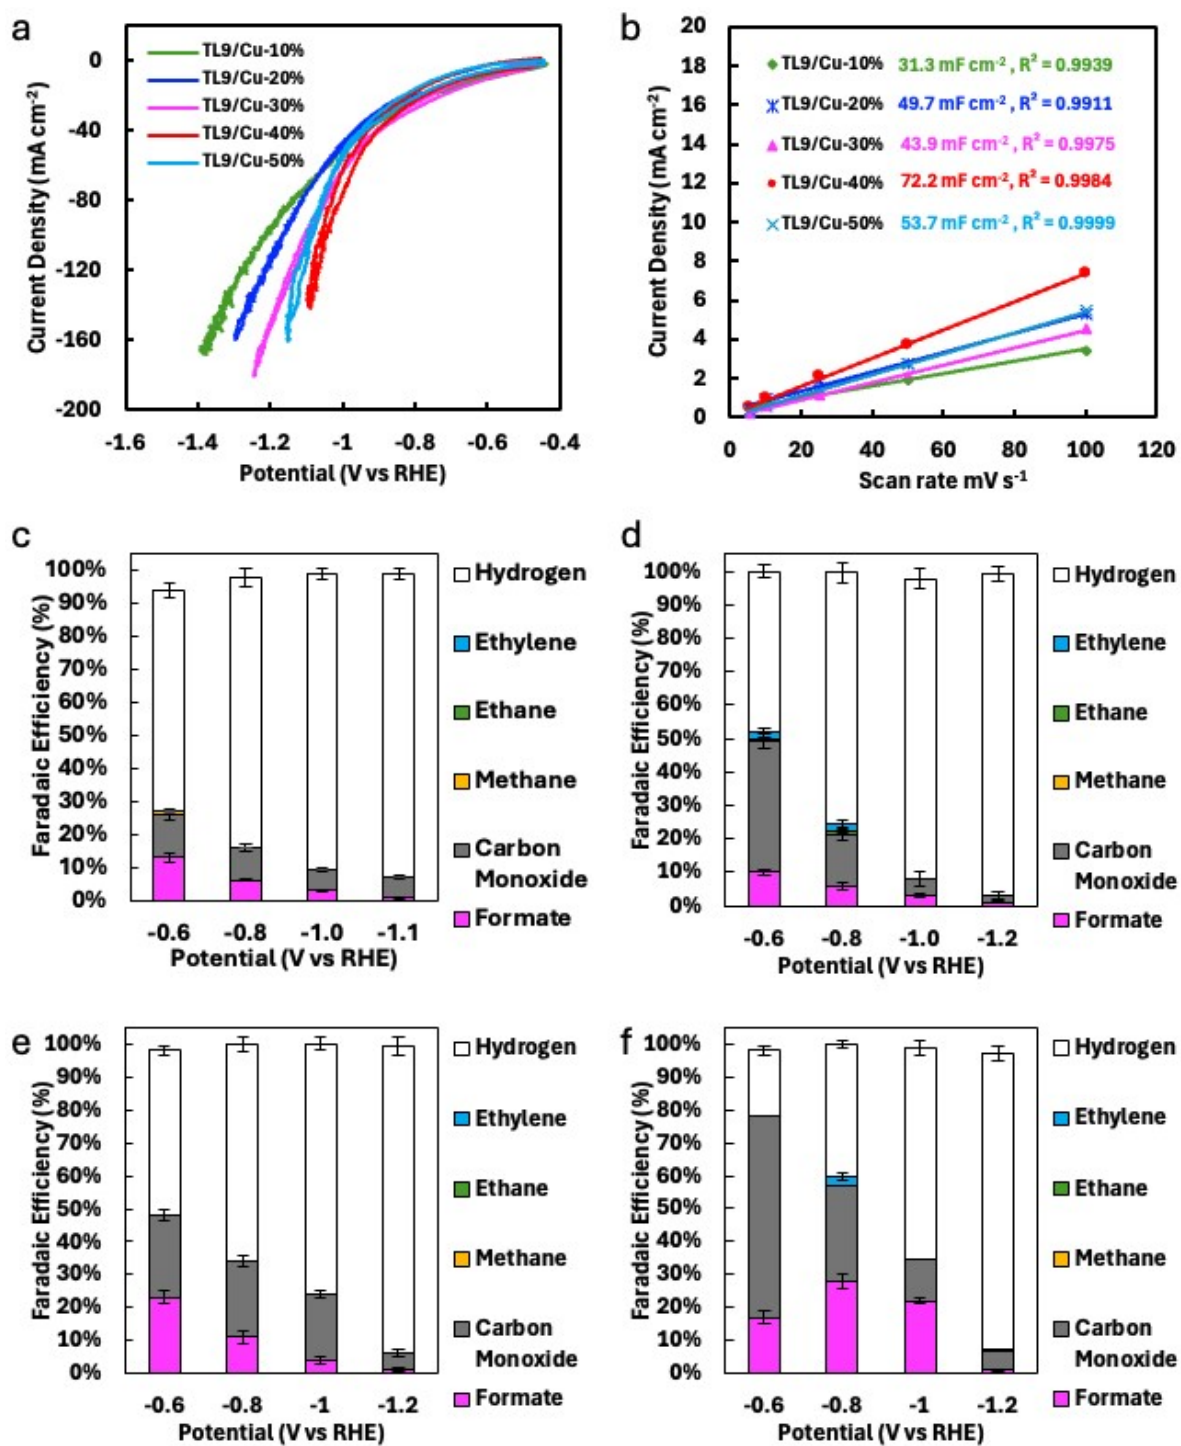

**Figure S11.** (a) Cyclic voltammograms and (b) double-layer capacitance ( $C_{dl}$ ) of TL9/Cu composites with different  $\text{Cu}_2\text{O}$  loadings. Faradaic efficiencies of (c) TL9/Cu-10%, (d) TL9/Cu-20%, (e) TL9/Cu-30%, and (f) TL9/Cu-50% using H-type cell in 0.5 M  $\text{KHCO}_3$  electrolyte saturated with  $\text{CO}_2$  ( $\text{pH} = 7.4$ ).

**Table S5.** Results of EIS fitting according to the equivalent circuit.

| Element                   | TL9/Cu-<br>40% | YEC/Cu-<br>40%       |
|---------------------------|----------------|----------------------|
| $R_s (\Omega)$            | 5.19           | 4.91                 |
| $R_p (\Omega)$            | 3.43           | 2.80                 |
| $CPE1 (m\Omega^{-1}s^n)$  | 1.91           | $564 \times 10^{-3}$ |
| $n_{CPE1}$                | 0.549          | 0.702                |
| $R_{ct} (\Omega)$         | 26             | 40                   |
| $CPE2 (\Omega^{-1}s^n)$   | 150            | 100                  |
| $n_{CPE2}$                | 1.05           | 0.6                  |
| $W (m\Omega^{-1}s^{0.5})$ | 489            | $1.1 \times 10^{15}$ |

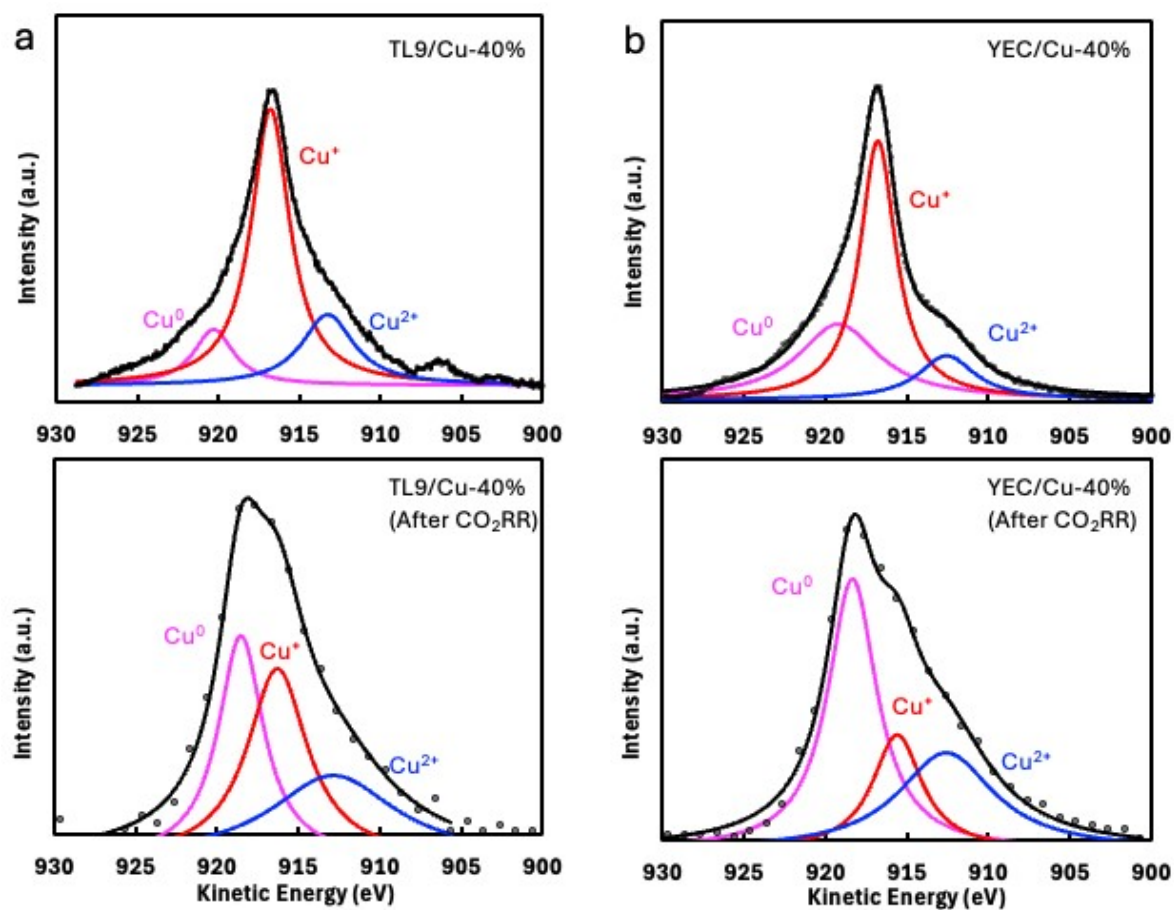

**Figure S12.** Cu LMM spectra of (a) TL9/Cu-40% and (b) YEC/Cu-40% before (top) and after (bottom) 24 hours of  $\text{CO}_2\text{RR}$  electrolysis at -0.6 V vs RHE using H-type cell in 0.5 M  $\text{KHCO}_3$  electrolyte saturated with  $\text{CO}_2$  (pH = 7.4).

**Table S6.** Relative composition of each Cu oxidation state determined from Cu LMM region of TL9/Cu-40% and YEC/Cu-40% before and after 24 hours of CO<sub>2</sub>RR electrolysis at -0.6 V vs RHE using H-type cell in 0.5 M KHCO<sub>3</sub> electrolyte saturated with CO<sub>2</sub> (pH = 7.4).

| Oxidation State                          | Cu <sup>0</sup> |                | Cu <sup>+</sup> |                | Cu <sup>2+</sup> |                |
|------------------------------------------|-----------------|----------------|-----------------|----------------|------------------|----------------|
|                                          | Sample          |                | Sample          |                | Sample           |                |
|                                          | K.E.<br>(eV)    | Content<br>(%) | K.E.<br>(eV)    | Content<br>(%) | K.E.<br>(eV)     | Content<br>(%) |
| TL9/Cu-40%                               | 920.1           | 14%            | 916.8           | 64%            | 913.2            | 22%            |
| TL9/Cu-40% (After<br>CO <sub>2</sub> RR) | 918.3           | 32%            | 916.3           | 36%            | 912.9            | 33%            |
| YEC/Cu-40%                               | 919.2           | 34%            | 916.8           | 52%            | 912.6            | 14%            |
| YEC/Cu-40% (After<br>CO <sub>2</sub> RR) | 918.3           | 46%            | 916.0           | 20%            | 912.6            | 34%            |

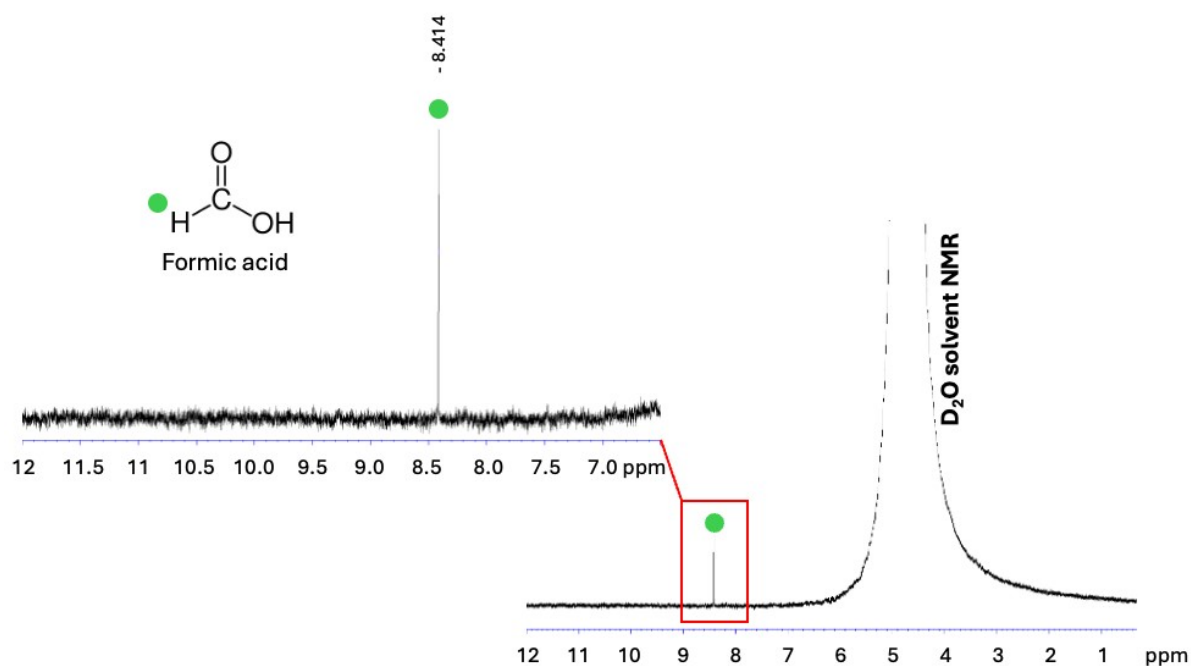

**Figure S13.**  $^1\text{H}$  NMR spectrum of the post- $\text{CO}_2\text{RR}$  electrolyte from working electrode chamber recorded in  $\text{D}_2\text{O}$ . The singlet at  $\sim 8.41$  ppm corresponds to the formate proton ( $\text{HCOO}^-/\text{HCOOH}$ ) (1).

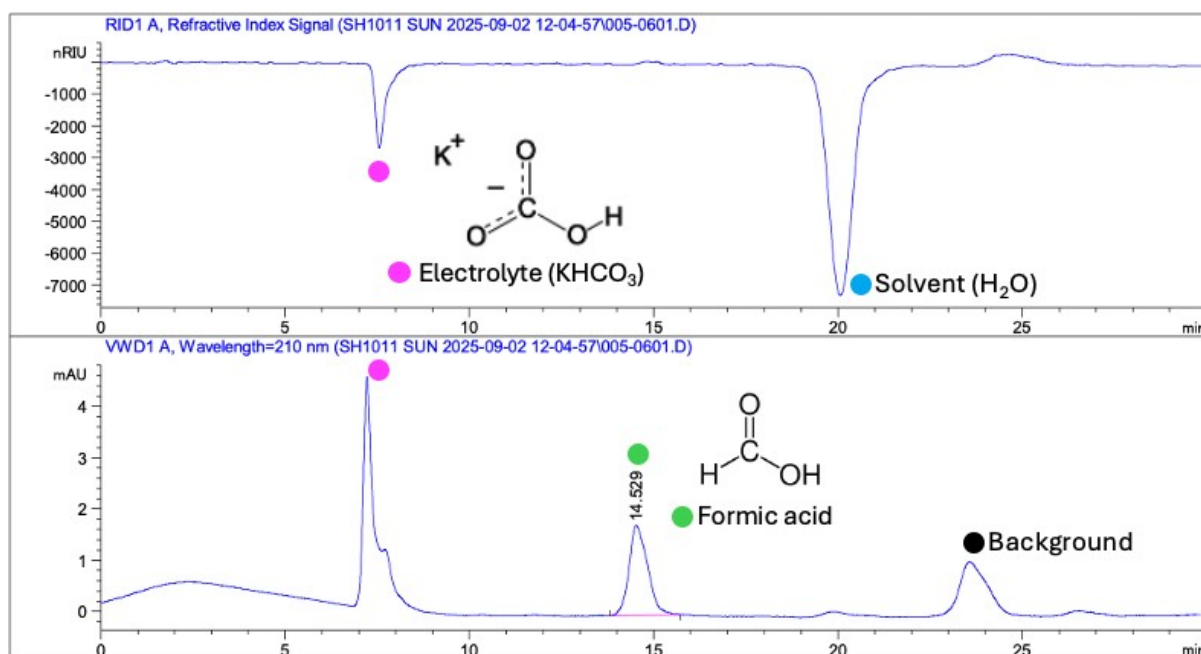

**Figure S14.** HPLC analysis of the liquid products after  $\text{CO}_2$  electroreduction. The chromatograms obtained from RID (top) and UV detection at 210 nm (bottom) show a distinct peak at  $\sim 14.5$  min, which matches the retention time of the formate standard,

confirming formate ( $\text{HCOO}^-/\text{HCOOH}$ ) as the dominant liquid-phase product. The signal in both RID and UV detection at  $\sim 7.5$  min were from the electrolyte ( $0.5 \text{ M KHCO}_3$ ). A large negative signal at  $\sim 20$  min in the RID trace arises from the solvent ( $\text{H}_2\text{O}$ ). A weak late-eluting feature at  $\sim 24$  min observed in the UV trace is attributed to the electrolyte background after prolonged electrolysis (2, 3).

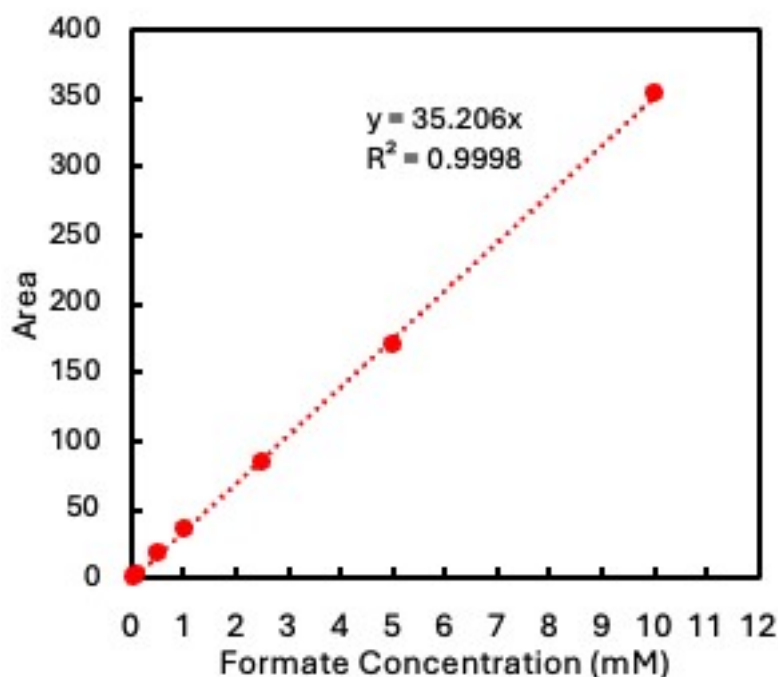

**Figure S15.** Calibration curve for formate quantification obtained by HPLC, showing a linear relationship between peak area and formate concentration.

## References

1. Preikschas P, Martín AJ, Yeo BS, Pérez-Ramírez J. NMR-based quantification of liquid products in  $\text{CO}_2$  electroreduction on phosphate-derived nickel catalysts. *Communications Chemistry* 2023 6:1. 2023;6(1).



2. Verma S, Lu X, Ma S, Masel RI, Kenis PJA. The effect of electrolyte composition on the electroreduction of CO<sub>2</sub> to CO on Ag based gas diffusion electrodes. *Physical Chemistry Chemical Physics*. 2016;18(10).
3. Marcandalli G, Monteiro MCO, Goyal A, Koper MTM. Electrolyte Effects on CO<sub>2</sub> Electrochemical Reduction to CO. *Accounts of Chemical Research*. 2022;55(14).
